# Supplementary material for: PEDF mediates pathological neovascularization by regulating macrophage recruitment and polarization in the mouse model of oxygen-induced retinopathy
Source: PubMed Central journal article supplement (PMC5314378; doi:10.1038/srep42846), 2017-02-17
Supplement: srep42846-s1.pdf [file srep42846-s1.pdf]

**PEDF mediates pathological neovascularization by regulating  
macrophage recruitment and polarization in the mouse model of  
oxygen-induced retinopathy**

Sha Gao<sup>1#</sup>, Changwei Li<sup>2#</sup>, Yanji Zhu<sup>1</sup>, Yanuo Wang<sup>1</sup>, Ailing Sui<sup>1</sup>, Yisheng  
Zhong<sup>1\*</sup>, Bing Xie<sup>1\*</sup>, Xi Shen<sup>1\*</sup>

<sup>1</sup> Department of Ophthalmology, Ruijin Hospital, Shanghai Jiaotong  
University School of Medicine, 197 Ruijin 2nd Road, Shanghai, 200025,  
People's Republic of China.

<sup>2</sup> Shanghai Key Laboratory for Prevention and Treatment of Bone and Joint  
Diseases with Integrated Chinese-Western Medicine, Shanghai Institute of  
Traumatology and Orthopedics, Ruijin Hospital, Shanghai Jiaotong  
University School of Medicine, 197 Ruijin 2nd Road, Shanghai, 200025,  
People's Republic of China.

# These authors contributed equally to this work

\* Corresponding authors:

Xi Shen

The Department of Ophthalmology, Ruijin Hospital, Shanghai Jiao Tong  
University School of Medicine, Shanghai, China; Address: No. 197, Ruijin  
2nd Road, Shanghai 200025 China; Zip Code: 200025; Phone: +86 21  
64335742; Fax: +86 21 64370045; E-mail: [carl\\_shen2016@126.com](mailto:carl_shen2016@126.com)

Yisheng Zhong

The Department of Ophthalmology, Ruijin Hospital, Shanghai Jiao Tong University School of Medicine, Shanghai, China; Address: No. 197, Ruijin 2nd Road, Shanghai 200025 China; Zip Code: 200025; Phone: +86 21 64335742; Fax: +86 21 64370045; E-mail: [zhongyis2016@126.com](mailto:zhongyis2016@126.com)

Bing Xie

The Department of Ophthalmology, Ruijin Hospital, Shanghai Jiao Tong University School of Medicine, Shanghai, China; Address: No. 197, Ruijin 2nd Road, Shanghai 200025 China; Zip Code: 200025; Phone: +86 21 64335742; Fax: +86 21 64370045; E-mail: [bingxie2016@126.com](mailto:bingxie2016@126.com)

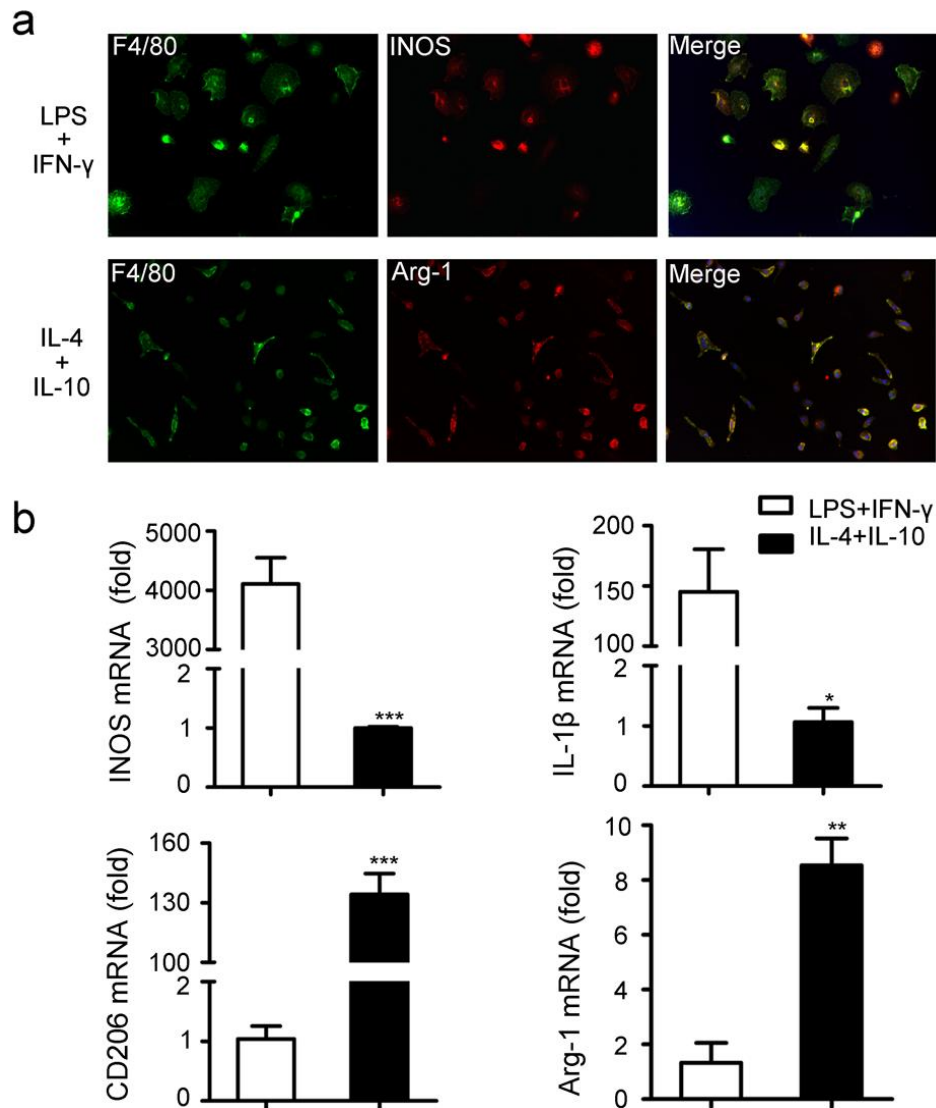

**Supplementary figure 1, M1- and M2-like macrophages related genes expression induced by LPS plus INF- $\gamma$  or IL-4 plus IL-10.** (a) Immunofluorescence analysis of F4/80 and iNOS in bone marrow derived macrophages induced by LPS plus INF- $\gamma$  or IL-4 plus IL-10. (b) Quantitation of iNOS, IL-1 $\beta$ , CD206 and Arg-1 expression in bone marrow derived macrophages induced by LPS plus INF- $\gamma$  or IL-4 plus IL-10. \* $P$ <0.05, \*\* $P$ <0.01, \*\*\* $P$ <0.001.  $P$  values were analyzed by two-tailed t tests. All data are representative of three independent and are means  $\pm$  SEM.

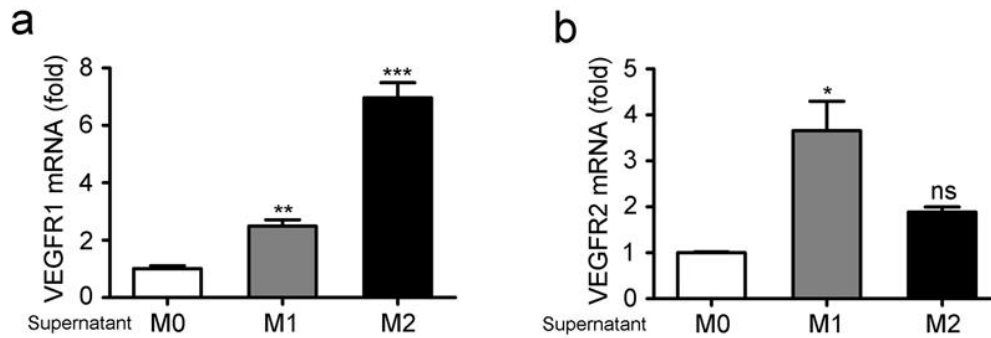

**Supplementary figure 2, VEGFR1 and VEGFR2 expression in HUVECs induced by the supernatant of M0-, M1- and M2-like macrophages.** (a&b) Quantitation of VEGFR1 (a) and VEGFR2 (b) in human umbilical vein endothelial cells (HUVECs) post 24 hours incubated with the supernatant of M0-, M1-, or M2-like macrophages. \* $P < 0.05$ , \*\* $P < 0.01$ , \*\*\* $P < 0.001$ .  $P$  values were analyzed by one-way ANOVA. All data are representative of three independent experiments and are means  $\pm$  SEM.
